# Supplementary material
Source: PubMed Central journal article supplement (PMC5743598)
Supplement: NIHMS910079-supplement.pdf [file NIHMS910079-supplement.pdf]

| Amino Acid   | Cortex           |                | Cerebellum       |               | Hippocampus      |               |
|--------------|------------------|----------------|------------------|---------------|------------------|---------------|
|              | Pair-fed Control | Alcohol        | Pair-fed Control | Alcohol       | Pair-fed Control | Alcohol       |
| <b>ALA</b>   | 2.81 ± 0.124     | 2.92 ± 0.107   | 0.58 ± 0.149     | 2.10 ± 0.182* | 0.72 ± 0.151     | 2.23 ± 0.195* |
| <b>ARG</b>   | 0.65 ± 0.040     | 0.81 ± 0.063   | 0.08 ± 0.022     | 0.66 ± 0.067* | 0.11 ± 0.026     | 0.54 ± 0.040* |
| <b>ASN</b>   | 0.58 ± 0.031     | 0.67 ± 0.024   | 0.10 ± 0.023     | 0.55 ± 0.050* | 0.13 ± 0.027     | 0.48 ± 0.036* |
| <b>ASP</b>   | 1.07 ± 0.062     | 1.16 ± 0.048   | 0.33 ± 0.101     | 1.05 ± 0.084* | 0.27 ± 0.057     | 0.77 ± 0.042* |
| <b>b-ALA</b> | 0.04 ± 0.007     | 0.09 ± 0.025   | 0.03 ± 0.017     | 0.02 ± 0.003  | 0.02 ± 0.003     | 0.08 ± 0.014* |
| <b>CIT</b>   | 0.19 ± 0.089     | 0.11 ± 0.009   | 0.09 ± 0.056     | 0.24 ± 0.111  | 0.04 ± 0.007     | 0.14 ± 0.022* |
| <b>GLN</b>   | 3.45 ± 0.131     | 2.68 ± 0.175*  | 1.11 ± 0.176     | 2.19 ± 0.206* | 1.04 ± 0.172     | 2.45 ± 0.220* |
| <b>GLU</b>   | 3.53 ± 0.194     | 3.29 ± 0.121   | 0.84 ± 0.249     | 2.33 ± 0.228* | 1.10 ± 0.233     | 2.73 ± 0.202* |
| <b>GLY</b>   | 1.36 ± 0.047     | 1.53 ± 0.090   | 0.35 ± 0.088     | 1.34 ± 0.104* | 0.26 ± 0.053     | 1.08 ± 0.095* |
| <b>HIS</b>   | 0.56 ± 0.036     | 0.55 ± 0.026   | 0.08 ± 0.013     | 0.38 ± 0.042* | 0.09 ± 0.022     | 0.39 ± 0.030* |
| <b>ILE</b>   | 0.36 ± 0.022     | 0.45 ± 0.018*  | 0.05 ± 0.011*    | 0.38 ± 0.036* | 0.07 ± 0.016     | 0.34 ± 0.024* |
| <b>LEU</b>   | 0.85 ± 0.047     | 1.05 ± 0.050*  | 0.11 ± 0.025     | 0.88 ± 0.086* | 0.17 ± 0.037     | 0.75 ± 0.055* |
| <b>LYS</b>   | 0.90 ± 0.066     | 1.10 ± 0.064   | 0.14 ± 0.036     | 0.85 ± 0.084* | 0.20 ± 0.043     | 0.75 ± 0.053* |
| <b>MET</b>   | 0.33 ± 0.012     | 0.35 ± 0.015   | 0.04 ± 0.012     | 0.28 ± 0.029* | 0.08 ± 0.016     | 0.26 ± 0.016* |
| <b>ORN</b>   | 0.06 ± 0.006     | 0.09 ± 0.007*  | 0.01 ± 0.002     | 0.04 ± 0.002* | 0.02 ± 0.001     | 0.04 ± 0.006* |
| <b>PHE</b>   | 0.38 ± 0.015     | 0.42 ± 0.020   | 0.06 ± 0.013     | 0.34 ± 0.031* | 0.09 ± 0.019     | 0.32 ± 0.020* |
| <b>SER</b>   | 1.69 ± 0.076     | 1.99 ± 0.099*  | 0.26 ± 0.055     | 1.61 ± 0.145* | 0.37 ± 0.081     | 1.48 ± 0.103* |
| <b>TAU</b>   | 16.32 ± 0.647    | 13.66 ± 0.565* | 4.43 ± 1.386     | 8.36 ± 0.795* | 3.28 ± 0.741     | 7.43 ± 0.824* |
| <b>THR</b>   | 1.10 ± 0.047     | 1.16 ± 0.066   | 0.19 ± 0.036     | 0.90 ± 0.071* | 0.25 ± 0.052     | 0.86 ± 0.064* |
| <b>TRP</b>   | 0.26 ± 0.014     | 0.21 ± 0.006*  | 0.05 ± 0.016     | 0.15 ± 0.014* | 0.08 ± 0.016     | 0.15 ± 0.012* |
| <b>TYR</b>   | 0.43 ± 0.018     | 0.49 ± 0.032   | 0.09 ± 0.019     | 0.42 ± 0.029* | 0.12 ± 0.022     | 0.37 ± 0.026* |
| <b>VAL</b>   | 0.66 ± 0.041     | 0.80 ± 0.031*  | 0.10 ± 0.022     | 0.65 ± 0.060* | 0.16 ± 0.032     | 0.61 ± 0.043* |
